# Supplementary material for: Screening and detection of multivalent human papillomavirus antibodies using a high-throughput liquid chip fluoroimmunoassay system
Source: Royal Society of Chemistry journal article supplement (doi:10.1039/d3ay00931a), 2023-01-01
Supplement: d3ay00931a1.pdf [file d3ay00931a1.pdf]

# Screening and detection of multivalent human papillomavirus antibodies using a high-throughput liquid chip fluoroimmunoassay system

Hong Wang,<sup>a</sup> Rong Hu,<sup>a</sup> Qiao Huang,<sup>a</sup> Haijiang Zhang,<sup>b</sup> En Zhang<sup>\*a</sup> and Huijie Yang<sup>\*c</sup>

*a. Chongqing Institute for Food and Drug Control, Chongqing 401121, P. R. China.*

*b. Health Guard Biotechnology Inc., Beijing 100176, P. R. China.*

*c. Division of respiratory virus vaccines, National Institutes for Food and Drug Control, Beijing, 102629, P. R. China*

\* To whom correspondence should be addressed. E-mail: [jieer6423@163.com](mailto:jieer6423@163.com).

## Table of Contents

|                                                                                |   |
|--------------------------------------------------------------------------------|---|
| Table S1. Correspondence between magnetic beads and antigens .....             | 1 |
| Table S2. Correspondence between different value and monoclonal antibody ..... | 1 |
| Table S3. Detailed concentrations for the 4-PL fit .....                       | 2 |
| Table S4. The RSD value for the repeatability experiment .....                 | 2 |
| Fig. S1 The optimization of Ab-PE concentration.....                           | 3 |
| Fig. S2 The screening of monoclonal antibody on IMBs .....                     | 4 |
| Fig. S3 Orthogonality study of antiserum in different dilution.....            | 5 |
| Fig. S4 The Ratios of the results of the HIGH and ELISA methods .....          | 6 |
| Fig. S5 The detection of antiserum by low concentration vaccine .....          | 7 |

Supporting Information

**Table S1. Correspondence between magnetic beads and antigens**

| Magnetic beads | Capture antigens |
|----------------|------------------|
| #26            | HPV 6            |
| #35            | HPV 11           |
| #44            | HPV 16           |
| #52            | HPV 18           |

**Table S2. Correspondence between different value and monoclonal antibody**

|             | Monoclonal antibody ID |             | Monoclonal antibody ID |
|-------------|------------------------|-------------|------------------------|
|             | 39G2                   |             | 2A1                    |
|             | 39G7                   |             | 4G12                   |
| Anti-HPV-6  | 42G5                   | Anti-HPV-16 | 5A6                    |
|             | 43C7                   |             | 6C7                    |
|             | 44B11                  |             | 7B9                    |
|             | 34C9                   |             | 1B1                    |
|             | 34D10                  |             | 3A2                    |
| Anti-HPV-11 | 34E5                   | Anti-HPV-18 | 3A4                    |
|             | 35C1                   |             | 4H5                    |
|             | 58F8                   |             | 7H8                    |

**Table S3. Detailed concentrations for the 4-PL fit**

| Concentration | Concentration/ pg/mL |                    |                    |                    |
|---------------|----------------------|--------------------|--------------------|--------------------|
|               | Anti-HPV-6           | Anti-HPV-11        | Anti-HPV-16        | Anti-HPV-18        |
| 256           | $5.00 \times 10^3$   | $5.00 \times 10^4$ | $5.00 \times 10^2$ | $2.50 \times 10^4$ |
| 128           | $2.50 \times 10^3$   | $2.50 \times 10^4$ | $2.50 \times 10^2$ | $1.25 \times 10^4$ |
| 64            | $1.25 \times 10^3$   | $1.25 \times 10^4$ | $1.25 \times 10^2$ | $6.25 \times 10^3$ |
| 32            | $6.25 \times 10^2$   | $6.25 \times 10^3$ | 62.5               | $3.13 \times 10^3$ |
| 16            | $3.13 \times 10^2$   | $3.13 \times 10^3$ | 31.3               | $1.56 \times 10^3$ |
| 8             | $1.56 \times 10^2$   | $1.56 \times 10^3$ | 15.6               | $7.81 \times 10^2$ |
| 4             | 78.1                 | $7.81 \times 10^2$ | 7.81               | $3.91 \times 10^2$ |
| 2             | 39.1                 | $3.91 \times 10^2$ | 3.91               | $1.95 \times 10^2$ |
| 1             | 19.5                 | $1.95 \times 10^2$ | 1.95               | 97.7               |

**Table S4. The RSD value for the repeatability experiment**

| Antiserum antibody | Dilution |        |        |        |
|--------------------|----------|--------|--------|--------|
|                    | 1:8000   | 1:4000 | 1:2000 | 1:1000 |
| Anti-HPV-6         | 4.4%     | 2.0%   | 5.7%   | 8.5%   |
| Anti-HPV-11        | 6.6%     | 3.4%   | 5.1%   | 6.6%   |
| Anti-HPV-16        | 10.6%    | 10.9%  | 9.1%   | 8.7%   |
| Anti-HPV-18        | 6.3%     | 2.6%   | 3.5%   | 6.8%   |

### The optimization of Ab-PE concentration

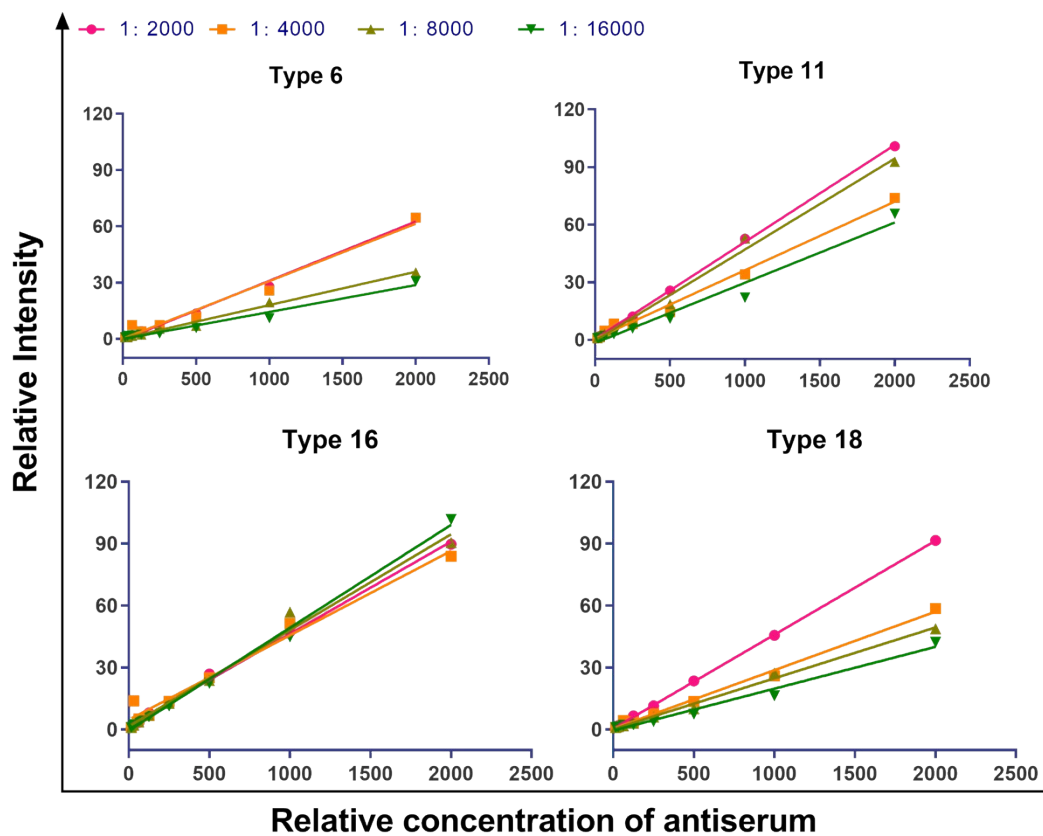

Fig. S1 The optimization of Ab-PE concentration (at four dilutions: 1:2000, 1:4000, 1:8000, 1:16000) for the four anti-HPV antibodies.

### The screening of monoclonal antibody on IMBs

The screening of monoclonal antibodies was based on two principles: one is lower signal-crosstalk and the other is similar fluorescence signal ratio to the antiserum detection.

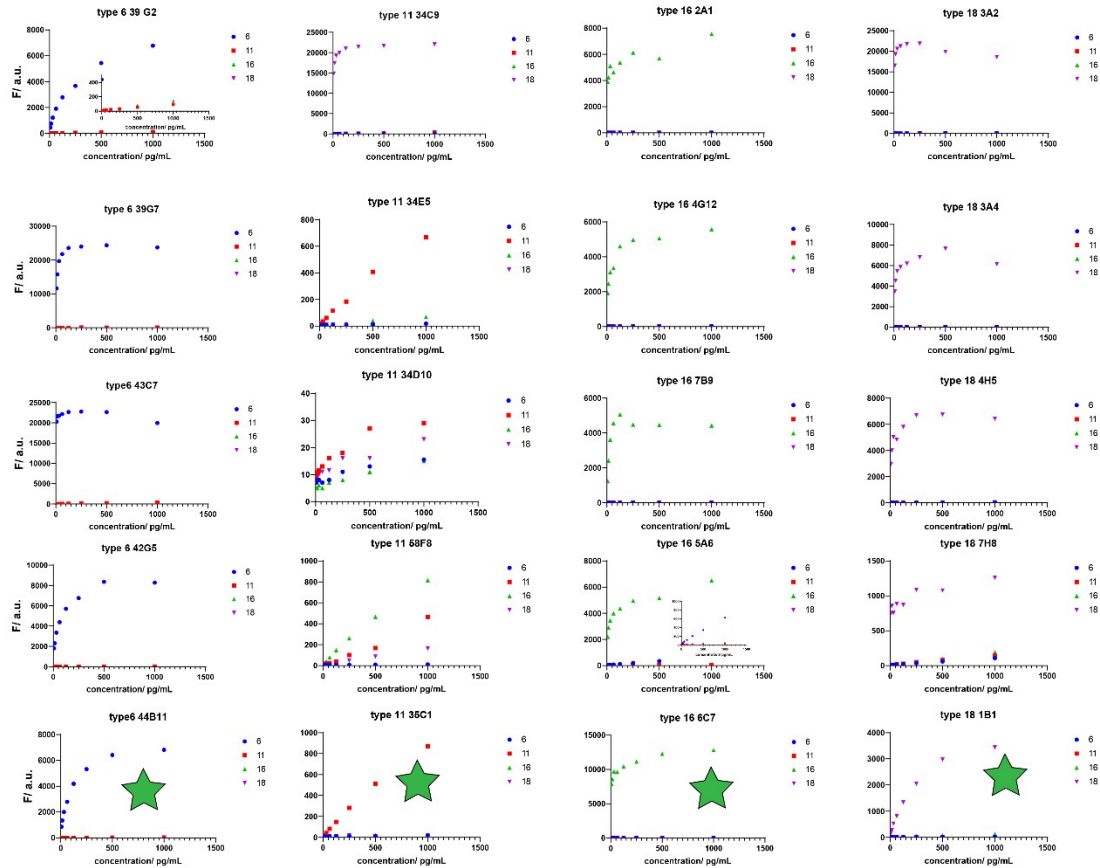

Fig. S2 The screening of 20 monoclonal antibodies by incubating with every antibody with a mixture of four IMBs.

Orthogonality study of antiserum in different dilution

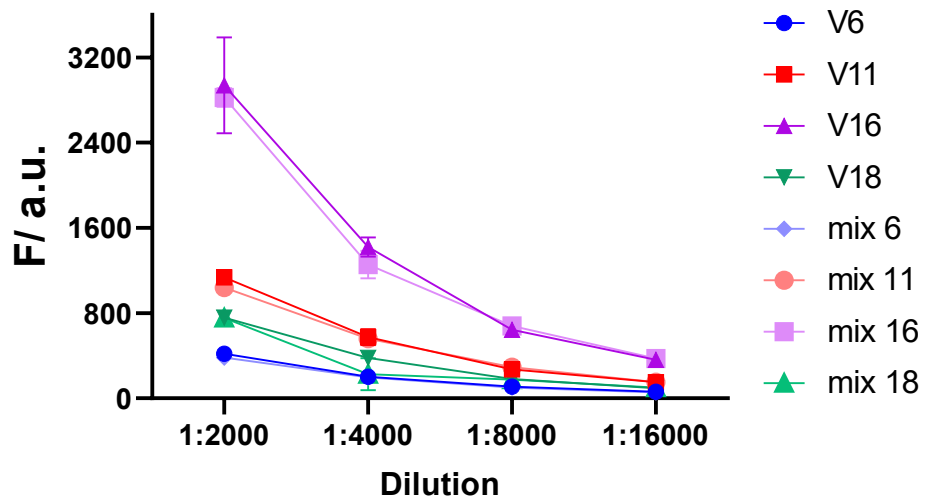

Fig. S3 Fluorescence intensity of HPV antiserum incubated with single and mixed IMBs at a series of four dilutions.

**The Ratios of the results of the HIGH and ELISA methods**

To obvious compare the performance of the two HIGH and ELISA methods, we calculated the ratios of the results of the two analytical methods (HIGH/ELISA). Detection of HPV-6, 11, 16, and 18 antibodies by HIGH was on average 6, 10, 18, and 9 times more sensitive than ELISA, with the highest ratios being 27, 34, 54, and 42.

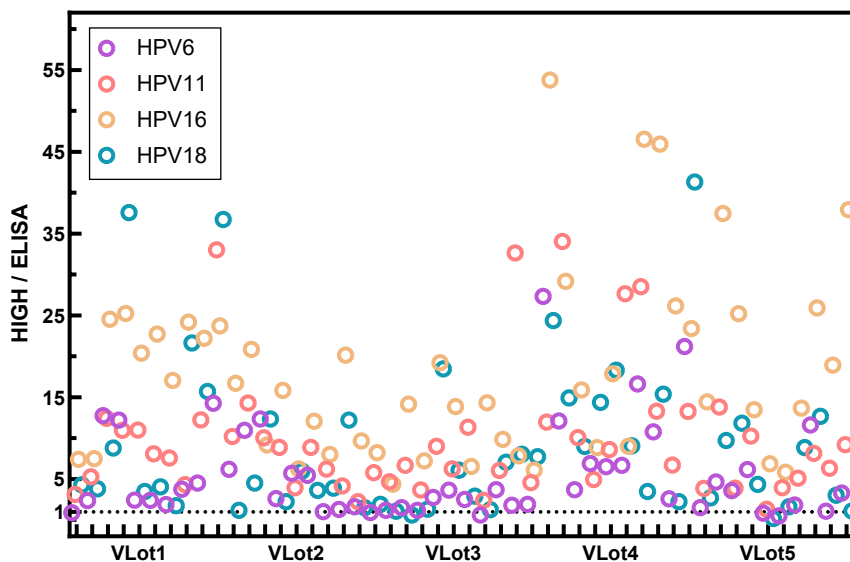

Fig. S4 Ratios of the results of the HIGH and ELISA methods for the quantification of four HPV antibodies.



The detection of antiserum by low concentration vaccine

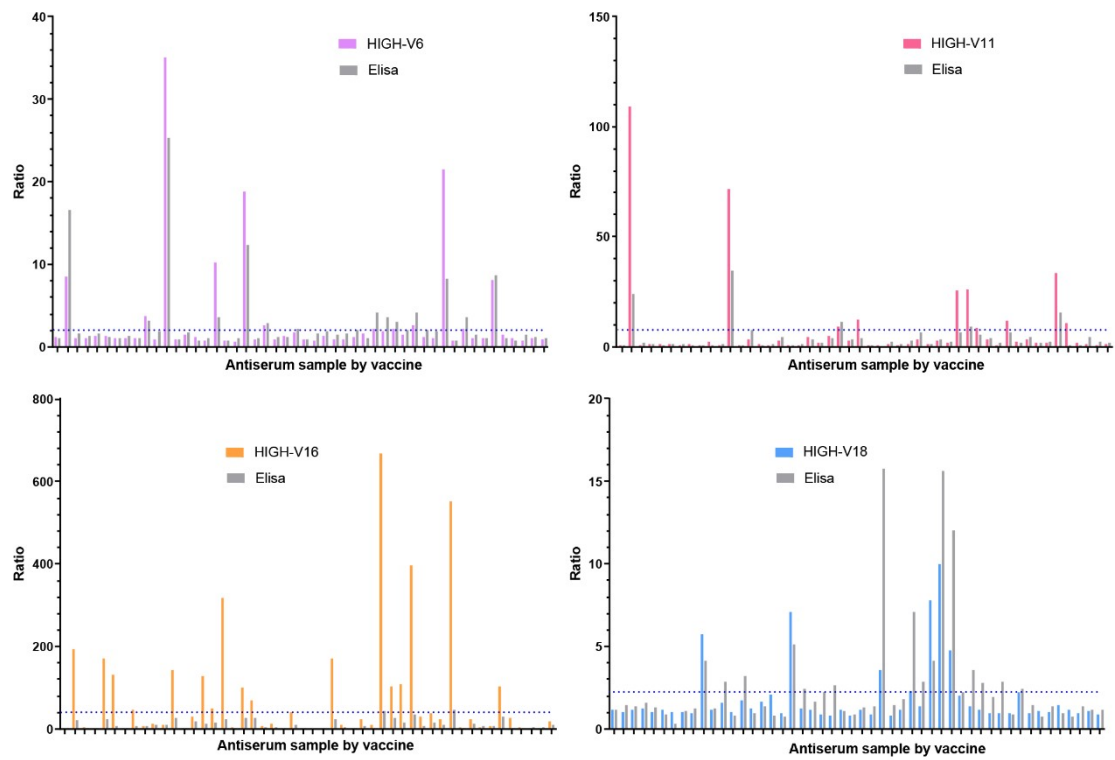

Fig. S5 Analysis of antisera from low concentration immunization for HPV antibodies by ELISA and HIGH.
